# Supplementary material for: Risk in the quality of aquatic ecosystems exposed to pesticides in a natural protected area of influence in western Mexico
Source: Research Square preprint supplement (doi:10.21203/rs.3.rs-7503650/v1), 2025-09-17
Supplement: Supplementary file 1 [file 1b6f3e8ddb6bb60a376bf12d.docx]

**Supporting Information**

**For**

**Risk in the quality of aquatic ecosystems exposed to pesticides in a natural protected area of influence in western Mexico.**

*Cruz-Esquivel Ángela, Martínez-Rivera Luis Manuela, Sandoval-Pinto Elenab, Meza-Rodríguez Demetrioa, Peregrina-Lucano Alejandro Aaronc*

a Department of Ecology and Natural Resources, South Coast University Center, University of Guadalajara, Autlan de Navarro, Jalisco, Mexico.

b Department of Cellular and Molecular Biology, University Center for Agricultural Biological Sciences, University of Guadalajara, Guadalajara, Jalisco

c Department of Pharmacobiology. University Center for Exact Sciences and Engineering, University of Guadalajara, Jalisco, Mexico

**Table S1.** Description of study sites

| **Sites** | **Altitude** | **Coordinates** | | **Description** | **Foto** |
| --- | --- | --- | --- | --- | --- |
|  |  | Latitude | Longitude |  |  |
| **S1** | 910 | 19º51'25.7'' | 104º17'22.8'' | Tropical deciduous forest, canyon-type landscapes. | 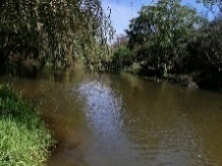 |
| **S2** | 870 | 19º47'28.1'' | 104º13'45.7'' | Peri-urban area, beginning of agricultural extensions. | 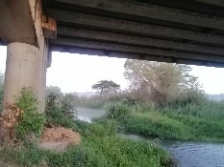 |
| **S3** | 866 | 19º45'27.6'' | 104º13'43.5'' | Valley area, sugar cane and corn crops. | 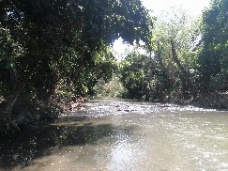 |
| **S4** | 866 | 19º45'41.3'' | 104º12'56.7'' | Wastewater discharge channel of the municipality of Autlan. | 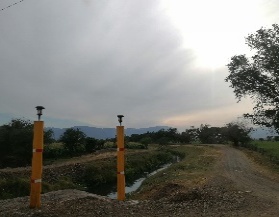 |
| **S5** | 860 | 19º44'3'' | 104º10'40.8'' | Valley area, sugar cane and corn crops. | 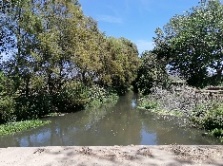 |
| **S6** | 860 | 19º44'41.7'' | 104º09'58.1'' | Wastewater discharge channel of the municipality of Grullo. | 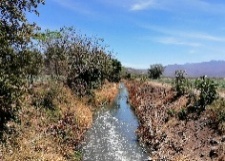 |
| **S7** | 858 | 19º42'40.6'' | 104º09'10.3'' | Valley area, sugar cane and corn crops. | 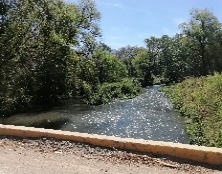 |
| **S8** | 848 | 19º41'27.6'' | 104º08'19.6' | Sierra de Manantlan Biosphere Reserve Area, tropical deciduous forest | 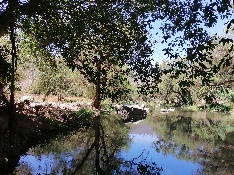 |
| **S9** | 848 | 19º41'24.9'' | 104º08'18' | Sierra de Manantlan Biosphere Reserve Area, tropical deciduous forest | 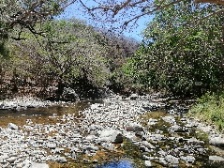 |
| **S10** | 810 | 19º39'57.7'' | 104º05'9.7' | Sierra de Manantlan Biosphere Reserve Area, relicts of horticultural crops. | 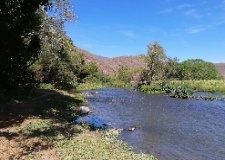 |
| **S11** | 692 | 19º36'2.9'' | 103º57'46.9' | Tropical deciduous forest, small relicts of agave plantations. | 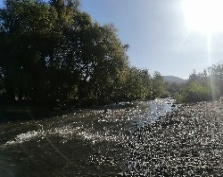 |
| **S12** | 701 | 19º36'41.7'' | 103º57'5' | Agave crops, influence of urban runoff. | 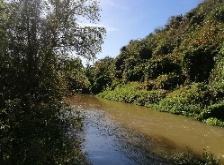 |
| **S13** | 680 | 19º35'58.6'' | 103º57'27.5' | Tropical deciduous forest, small relicts of agave plantations. | 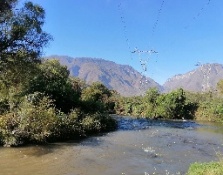 |

Chromatographic conditions:

For non-polar compounds: HPLC model 1200, Agilent Technologies brand, Zorbax Eclipse XDB C-18 chromatographic column, 2.1 x 5.0 mm, 3.5 micrometers. Mobile phase Water with 0.1% formic acid and 0.1% amino formate, Acetonitrile, gradient 60:40 to 0:100. Flow rate 0.5 mL/min, 3 minutes.

For polar compounds: HPLC model 1200, Agilent Technologies, Zorbax Eclipse XDB C-18 chromatographic column, 2.1 x 5.0 mm, 3.5 micrometers. Mobile phase 30:70 Water with 0.1% ammonium formate, 0.1% ammonium formate, acetonitrile. Flow rate 0.5 mL/min, 1 minute.

**Table S2.** Conditions for HPLC-MS/MS analysis

| Non-polar pesticides | | | | |
| --- | --- | --- | --- | --- |
| Name | Phase | Polarity | Ion Precursor | Ion Product |
| Acetochlor | Formic acid: Ammonium formate | Positive | 270.1 | 148.4 |
| 224.2 |
| Ametrine | Positive | 228.1 | 186 |
| 96 |
| Atrazine | Positive | 216 | 132 |
| Carbendazim | Positive | 192.1 | 160 |
| Carbofuran | Positive | 222 | 123 |
| Diazinon | Positive | 305 | 153 |
| Dimethoate | Positive | 230 | 171 |
| Emamectin | Positive | 887.1 | 158.1 |
| Imazalil | Positive | 297 | 159 |
| L-Cyalothrin | Positive | 467.1 | 225.1 |
| Malathion | Positive | 331 | 99 |
| Meclizine | Positive | 391.2 | 201.1 |
| Methomyl | Positive | 163.1 | 106 |
| 65 |
| 88.1 |
| Metoxuron | Positive | 229.1 | 72.1 |
| Molinate | Positive | 188.1 | 55.1 |
| Parathion | Positive | 292 | 236 |
| 264 |
| Picloram | Positive | 240.9 | 194.9 |
| 222.9 |
| Pyraclostrobin | Positive | 388 | 163 |
| Thiabendazole | Positive | 202 | 131 |
| Polar Pesticides | | | | |
| 2,4-D | Ammonium formate | Negative | 218.9 | 160.9 |
| 220.9 | 162.9 |
| Glufosinate | Negative | 179.9 | 136 |
| 118.9 |
| 94.9 |
| Glifosate | Negative | 168.2 | 149.9 |
| 81.1 |
| 62.8 |

**Table S3.** Reference values on permissible thresholds for physicochemical variables

| **Parameters** | **Aquatic life*** | **Reference** |
| --- | --- | --- |
| Temperature (°C) | 8 a 31 | -- |
| pH | 6.5-8.5 | U.S. EPA (2024) |
| DO (%) | 58.45 | CE-CCA (1989) |
| DO (ppm) | 5.5 | CE-CCA (1989) |
| µS/cm/C. E | 300-500 | U.S. EPA (2011) |
| TDS (ppm) | 500 | CCME (2007) |
| Turbidity (NTU) | 25 | CCME (2007) |
| NO3-N (mg/L) | 3 | CE-CCA (1989), CCME (2007) |
| PO4 (mg/L) | 0.11 | CE-CCA (1989) |
| FCOL (100ml) | 1000 | CE-CCA (1989) |
| L-cyhalothrin (ng/ml) | 0.23 | PPDB, 2009 |
| Malathion (ng/ml) | 2 | PPDB, 2009 |
| Methomyl (ng/ml) | 1.6 | PPDB, 2009 |

**Table S4.** Spatial distribution of physicochemical variables in the study sites.

| **Parameters** | | **S1** | **S2** | **S3** | **S4** | **S5** | **S6** | **S7** | **S8** | **S9** | **S10** | **S11** | **S12** | **S13** |
| --- | --- | --- | --- | --- | --- | --- | --- | --- | --- | --- | --- | --- | --- | --- |
| **Temperature (°C)** | Mediana | 24.7 | 23.7 | 27.4 | 24.2 | 26.1 | 28 | 26 | 26.7 | 24.7 | 26.2 | 24.6 | 25.6 | 24.8 |
| Min-Max | 18.2-33 | 18.8-30.6 | 21.1-30.5 | 16.6-33.6 | 21.7-32.1 | 22.3-34 | 22.4-29.6 | 23-31.3 | 19.9-31 | 21.6-29.8 | 20.6-29 | 21.9-28.5 | 19.8-29.2 |
| DAM | 4.5 | 2.4 | 3.1 | 1.5 | 2.3 | 1.9 | 2.1 | 2.7 | 2.6 | 2.3 | 1.3 | 2 | 1.9 |
| Test Dunn* | a | a | a | a | a | a | a | a | a | a | a | a | a |
| **pH** | Mediana | 8.51 | 7.7 | 7.6 | 7.8 | 7.67 | 7.72 | 7.76 | 7.9 | 8.67 | 8.24 | 8.45 | 8.28 | 8.34 |
| Min-Max | 7.6-9.3 | 7.2-8.2 | 7.3-8.1 | 7.3-8.3 | 7.2-8 | 7.4-8.3 | 7.3-8 | 7.6-8.2 | 7.8-9.2 | 7.8-8.6 | 8-8.8 | 7.9-8.6 | 7.1-8.8 |
| DAM | 0.45 | 0.28 | 0.28 | 0.22 | 0.26 | 0.23 | 0.21 | 0.24 | 0.32 | 0.24 | 0.26 | 0.22 | 0.25 |
| Test Dunn | b | a | a | a | a | a | a | a | b | b | b | b | b |
| **DO (%)** | Mediana | 102.5 | 75.3 | 57.3 | 20.6 | 29.3 | 27.4 | 28.9 | 72.4 | 98.7 | 91.7 | 101.8 | 86.3 | 96.7 |
| Min-Max | 52.1-198.6 | 39.1-88.9 | 6.1-93.6 | 0.3-87.1 | 15.6-78.6 | 4.5-175.4 | 13-68.1 | 38.8-91.9 | 72.3-124.5 | 38.5-130.4 | 27.3-118.9 | 28-122.4 | 54.2-116 |
| DAM | 18.2 | 12.3 | 12.3 | 10.7 | 8.08 | 6.6 | 9 | 9.6 | 9.6 | 9.3 | 10.2 | 12.4 | 16.4 |
| Test Dunn | d | bce | a | ab | a | a | a | bc | d | cde | d | cde | de |
| **DO (ppm)** | Mediana | 11.4 | 7.88 | 4.02 | 2.37 | 2.25 | 2.4 | 2.61 | 5.75 | 8.6 | 9.2 | 10.71 | 7.11 | 8 |
| Min-Max | 3.45-16.2 | 2.9-11.7 | 0.81-12.5 | 0.02-6.6 | 1.09-7.46 | 0.55-18.9 | 0.97-5.19 | 2.73-11.6 | 5.66-15.8 | 3.08-13.9 | 5.5-16.5 | 0.2-16.7 | 4.11-16 |
| DAM | 3.53 | 2.41 | 1.87 | 0.8 | 0.77 | 0.91 | 1.17 | 1.91 | 2.36 | 2.28 | 2.84 | 3.94 | 2.99 |
| Test Dunn | d | bd | a | ac | a | a | a | bc | d | bd | d | bd | bd |
| **µS/cm/C. E** | Mediana | 217 | 412 | 661 | 716 | 685 | 1023 | 701 | 682 | 109 | 557 | 647 | 684 | 608 |
| Min-Max | 37.5-455 | 38.2-496 | 42.7-831 | 44.2-1001 | 169.2-804 | 41.6-2000 | 44.8-827 | 42.8-804 | 35.3-190 | 41.5-740 | 42.9-870 | 85.2-1289 | 42.3-914 |
| DAM | 54 | 63 | 76 | 143 | 58 | 565 | 35 | 42 | 45 | 106 | 147 | 171 | 96 |
| Test Dunn | de | cde | ab | a | ab | b | ab | a | d | ace | a | ab | ac |
| **TDS (ppm)** | Mediana | 115 | 205 | 330 | 359 | 343 | 534 | 350 | 340 | 64 | 278 | 323 | 345 | 302 |
| Min-Max | 26.8-229 | 27-248 | 30.4-417 | 31.3-500 | 30.5-421 | 29.6-1000 | 31.1-413 | 30-401 | 25.2-699 | 29.5-370 | 30.4-435 | 60.1-644 | 23.8-457 |
| DAM | 33 | 33 | 37 | 70 | 28 | 279 | 19 | 23 | 19 | 56 | 74 | 85 | 68 |
| Test Dunn | d | cd | ab | a | a | b | ab | a | d | ac | a | ab | ac |
| **Turbidity (NTU)** | Mediana | 5.37 | 33 | 37.6 | 46.1 | 47.1 | 89.6 | 42 | 39.1 | 4.74 | 19.6 | 21.3 | 38.8 | 28.7 |
| Min-Max | 2.02-8 | 10.9-15 | 19-41 | 13.4-93 | 9.82-60 | 16.4-212 | 7.18-82 | 7.52-85 | 1.19-13 | 6.53-112 | 8.17-393 | 2.268-120 | 21-160 |
| DAM | 3.35 | 10.1 | 14.3 | 23 | 22.4 | 54.8 | 18.5 | 21 | 3.55 | 11.23 | 8.1 | 12.4 | 6.1 |
| Test Dunn | d | abc | abc | abc | abc | a | abc | abc | d | bc | b | ac | abc |
| **NO3-N (mg/L)** | Mediana | 2 | 3.4 | 3.3 | 4.4 | 3.2 | 3.8 | 3.2 | 4.1 | 1.65 | 4 | 3.4 | 2.5 | 3.3 |
| Min-Max | 0.2-11.6 | 2.4-6.8 | 1.2-11.4 | 1.6-15.6 | 0.8-7.7 | 1.7-12.1 | 0.9-11.9 | 0.9-7.6 | 0.4-3.1 | 1.1-9.8 | 2.1-11.5 | 0.9-7.7 | 1.6-11.4 |
| DAM | 0.9 | 0.7 | 0.7 | 2.1 | 0.8 | 1.8 | 1.4 | 1.2 | 0.6 | 1.3 | 0.7 | 1 | 1.1 |
| Test Dunn | bc | a | a | a | ab | a | ab | a | c | a | a | ab | ab |
| **PO4 (mg/L)** | Mediana | 0.39 | 0.67 | 0.63 | 2.33 | 1.99 | 1.82 | 1.86 | 1.61 | 0.2 | 1.26 | 1.17 | 0.63 | 1.11 |
| Min-Max | 0.14-1.23 | 0.37-1.54 | 0.05-12 | 0.14-12 | 1.35-4.8 | 0.07-39 | 1.37-15 | 1.07-21 | 0.04-0.55 | 0.65-5.9 | 0.04-2.15 | 0.016-27 | 0.09-22 |
| DAM | 0.17 | 0.11 | 0.27 | 1.96 | 0.5 | 0.72 | 0.34 | 0.33 | 0.14 | 0.22 | 0.13 | 0.34 | 0.39 |
| Test Dunn | ef | cef | ab | b | b | ab | ab | abc | f | abe | acd | cde | abcd |
| **F. Coliforms (100ml)** | Mediana | 300 | 700 | 900 | 925000 | 500000 | 530000 | 59000 | 23350 | 150 | 1200 | 300 | 2200 | 1750 |
| Min-Max | 100-7100 | 200-26800 | 100-48x10⁴ | 10000-88x10⁵ | 6700-36x10⁵ | 12800-395x10⁴ | 1700-118x10⁴ | 100-10x10⁵ | 100-28000 | 100-45x10⁴ | 100-12400 | 100-5x10⁴ | 100-26000 |
| DAM | 100 | 400 | 700 | 849100 | 360000 | 370000 | 52300 | 17700 | 50 | 1100 | 200 | 1000 | 1250 |
| Test Dunn | d | cd | cd | a | a | a | ab | bc | d | cd | d | bc | cd |

*Different letters indicate statistically significant differences

**Table S5.** Principal component analysis

|  | Comp.1 | Comp.2 |
| --- | --- | --- |
| Habitat | 0.12437755 | 0.74679342 |
| TEM | 0.09443582 | 0.10317857 |
| pH | -0.29058755 | -0.27225737 |
| DO | -0.47408819 | -0.17427917 |
| OS | -0.46234351 | -0.18598328 |
| EC | 0.38441755 | -0.38171436 |
| TDS | 0.41797761 | -0.33490026 |
| TUR | 0.27199461 | -0.1723505 |
| NO3N | 0.23703723 | -0.07069621 |


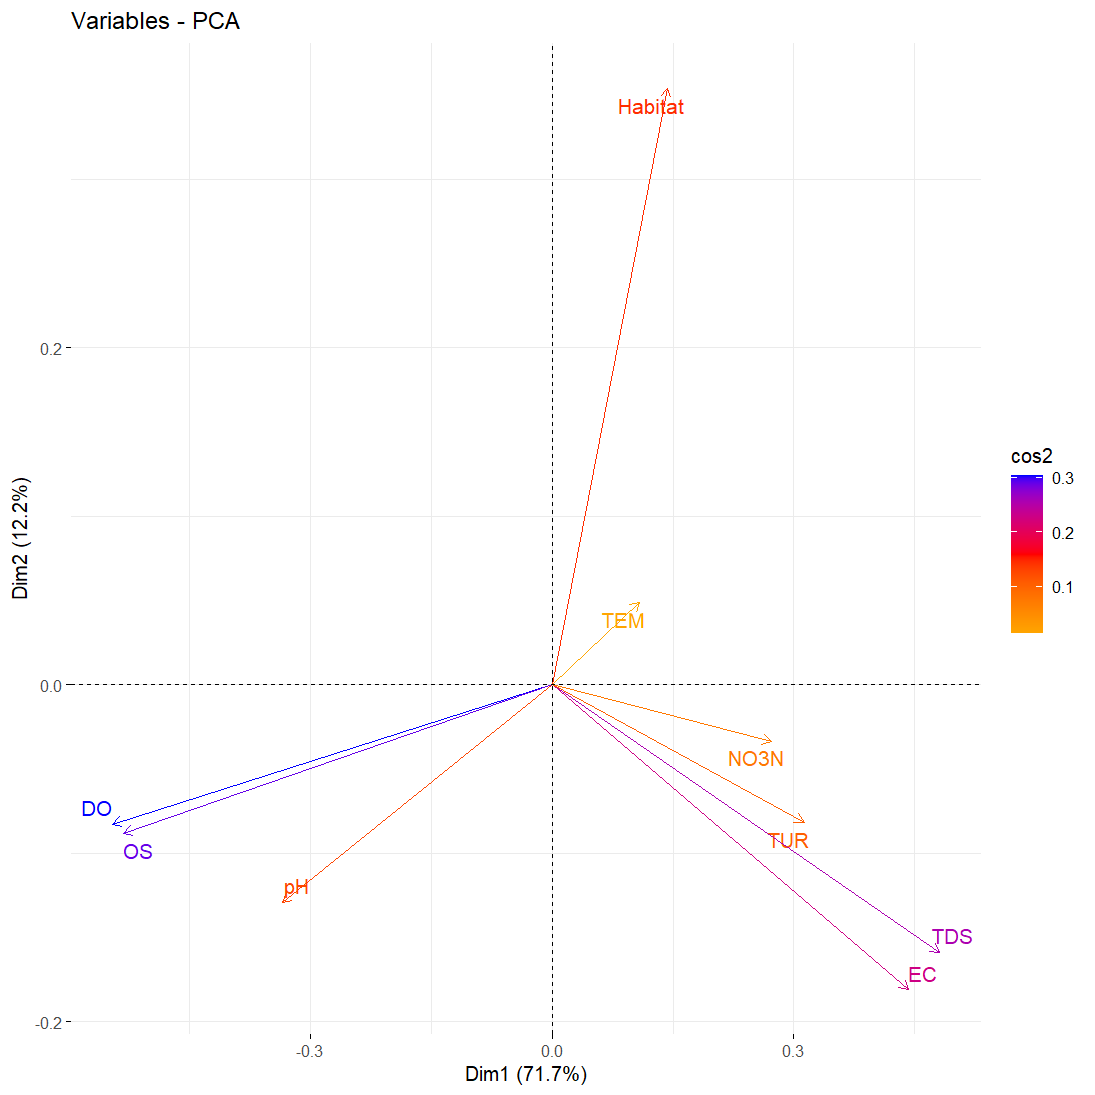


**Fig S1.** Principal component analysis of physicochemical variables.


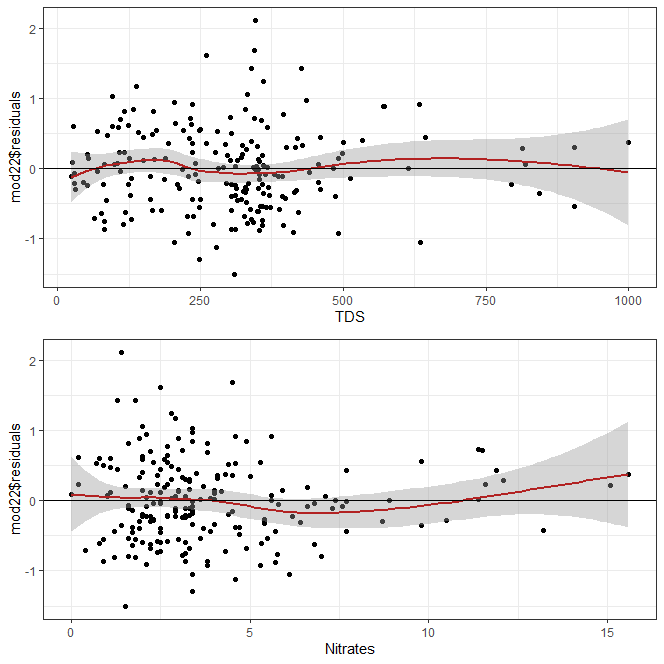


**Fig S2.** Linearity of predictors


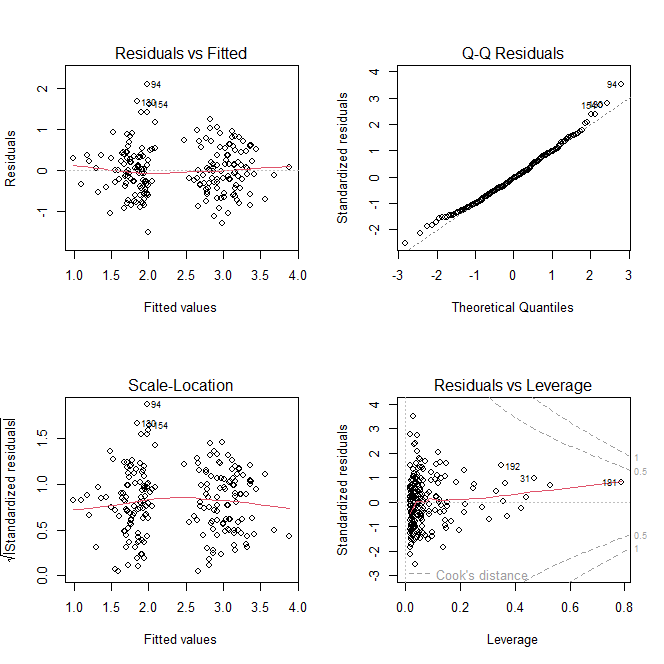


**Fig S3.** Verification of statistical assumptions

**References**

Canadian Council of Ministers of the Environment, (2017). Canadian water quality guidelines for the protection of aquatic life: CCME Water Quality Index, User’s Manual – 2017 Update. In: Canadian environmental quality guidelines, 1999, *Canadian Council of Ministers of the Environment*, Winnipeg. p 1-23

del Agua CEDC CE-CCA-001/89 (1989) *ACUERDO por el que se establecen los Criterios Ecológicos de Calidad del Aguas CE-CCA-001/89. Diario Oficial de la Federación. SEGOB*.

Footprint PPDB, (2009). Creating tools for pesticide risk assessment and management in Europe. *The Pesticide 0*, *2*(4): 6. Retrieved April 10, 2024, from <https://sitem.herts.ac.uk/aeru/ppdb/>

U.S. EPA, (2024). National Recommended Water Quality Criteria - Aquatic Life Criteria. Retrieved March 25, 2024, from <https://www.epa.gov/wqc/national-recommended-water-quality-criteria-aquatic-life-criteria-table>

U.S. EPA, (2011). A Field-Based Aquatic Life Benchmark For Conductivity In Central Appalachian Streams (Final Report). U.S. Environmental Protection Agency, Washington, DC, EPA/600/R-10/023F, 2011.
